# Supplementary material for: Quantitative assessment of the robustness of next-generation sequencing of antibody variable gene repertoires from immunized mice
Source: Springer Nature journal article supplement (doi:10.1186/s12865-014-0040-5), 2014-10-15

**A**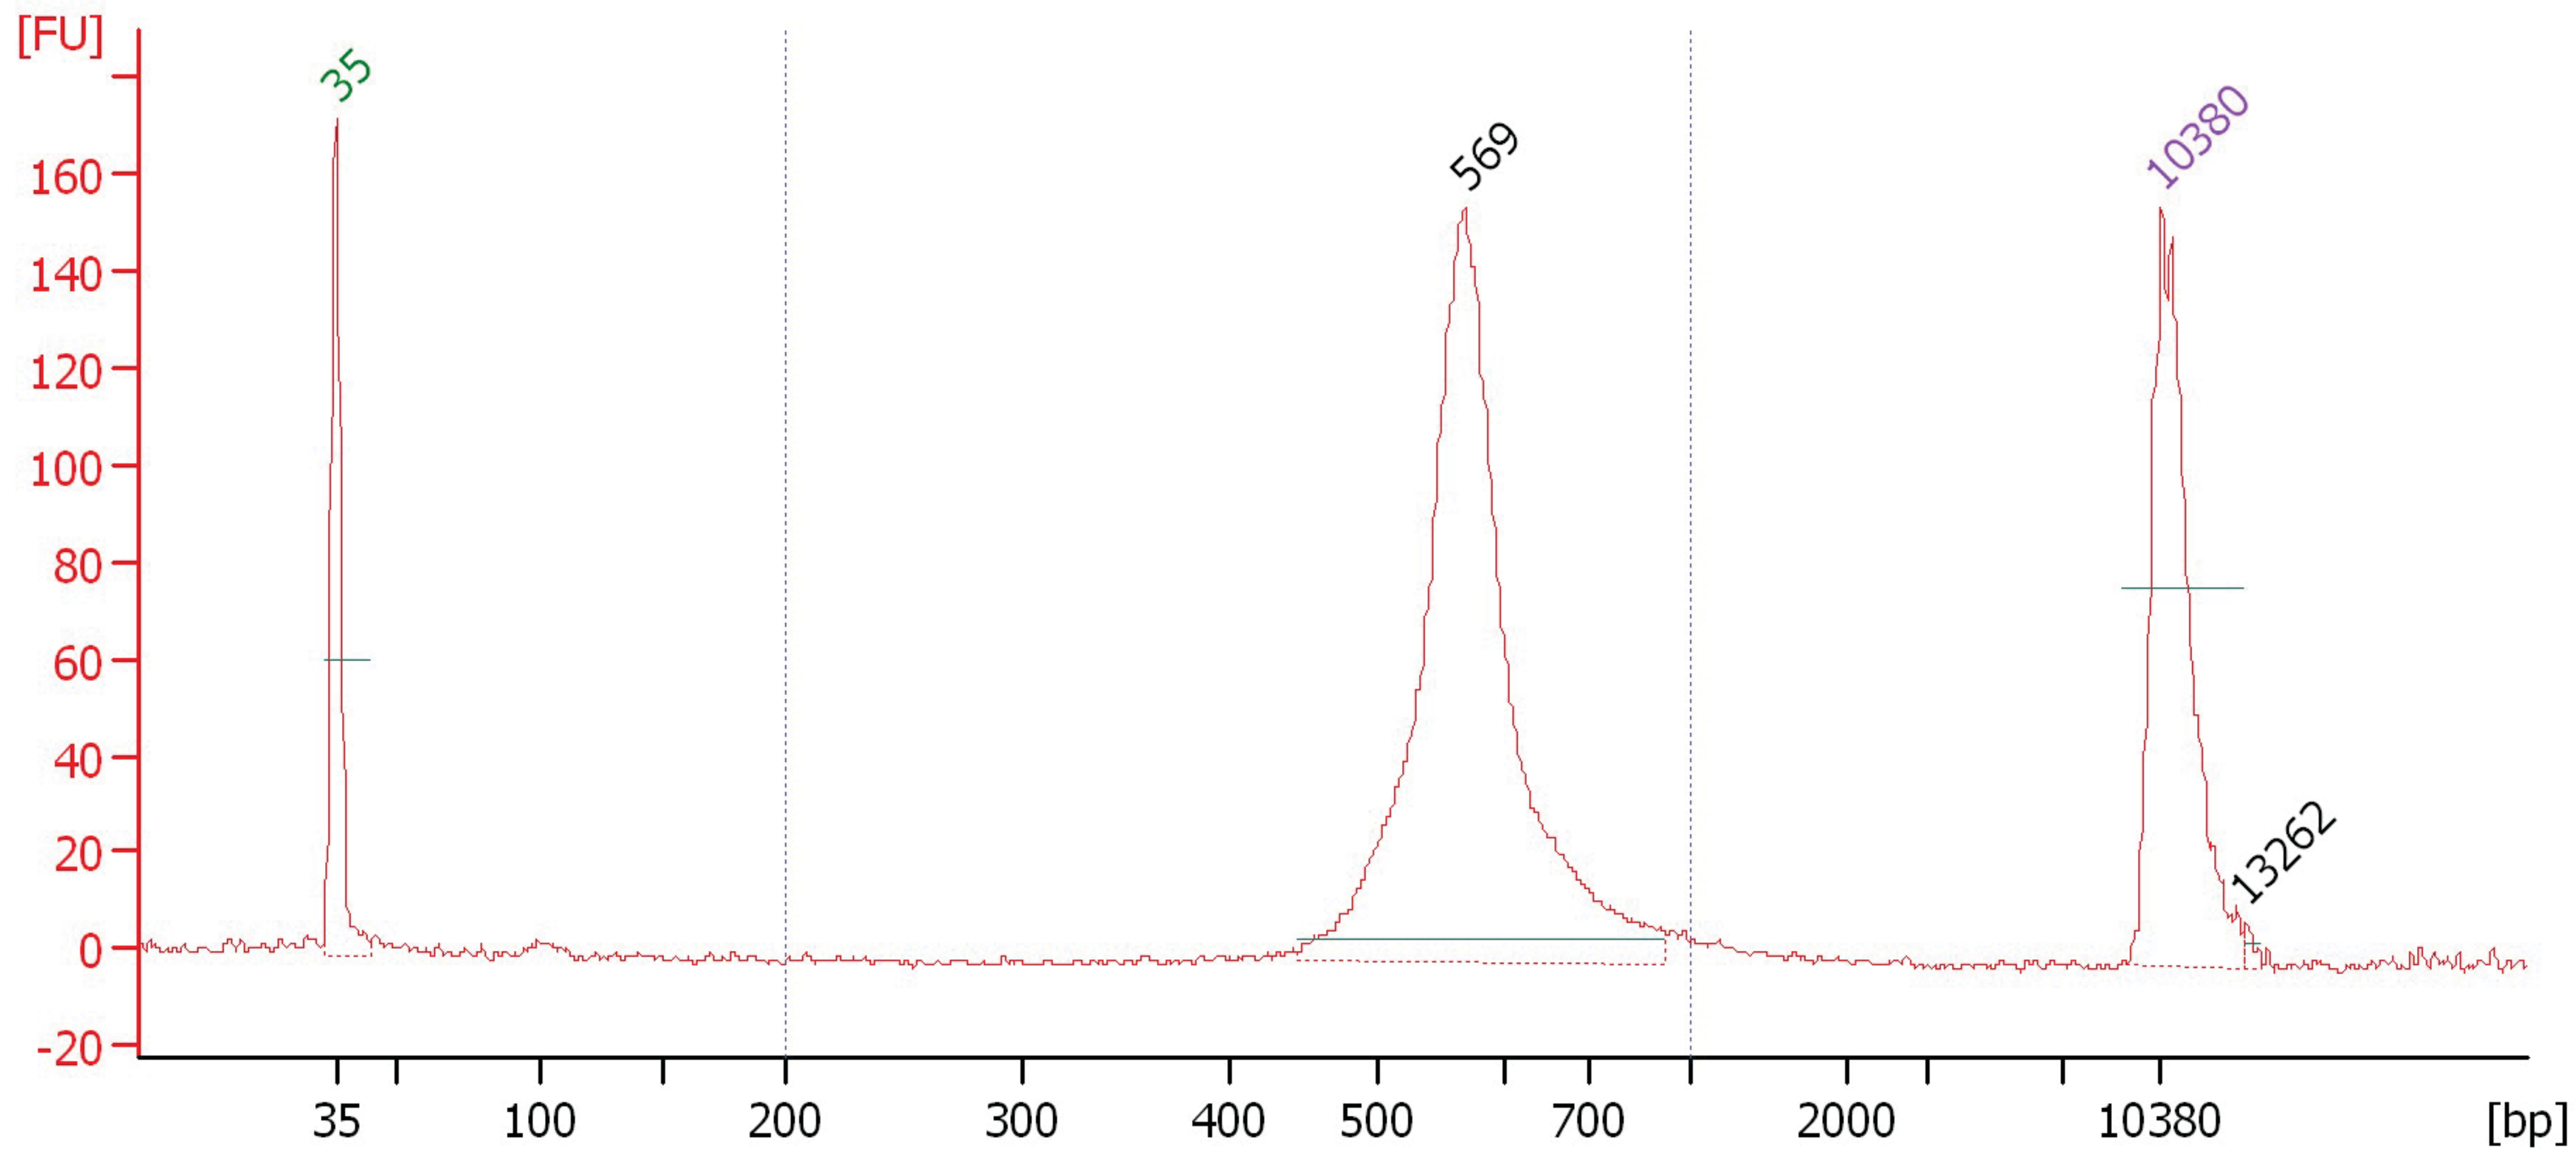**B**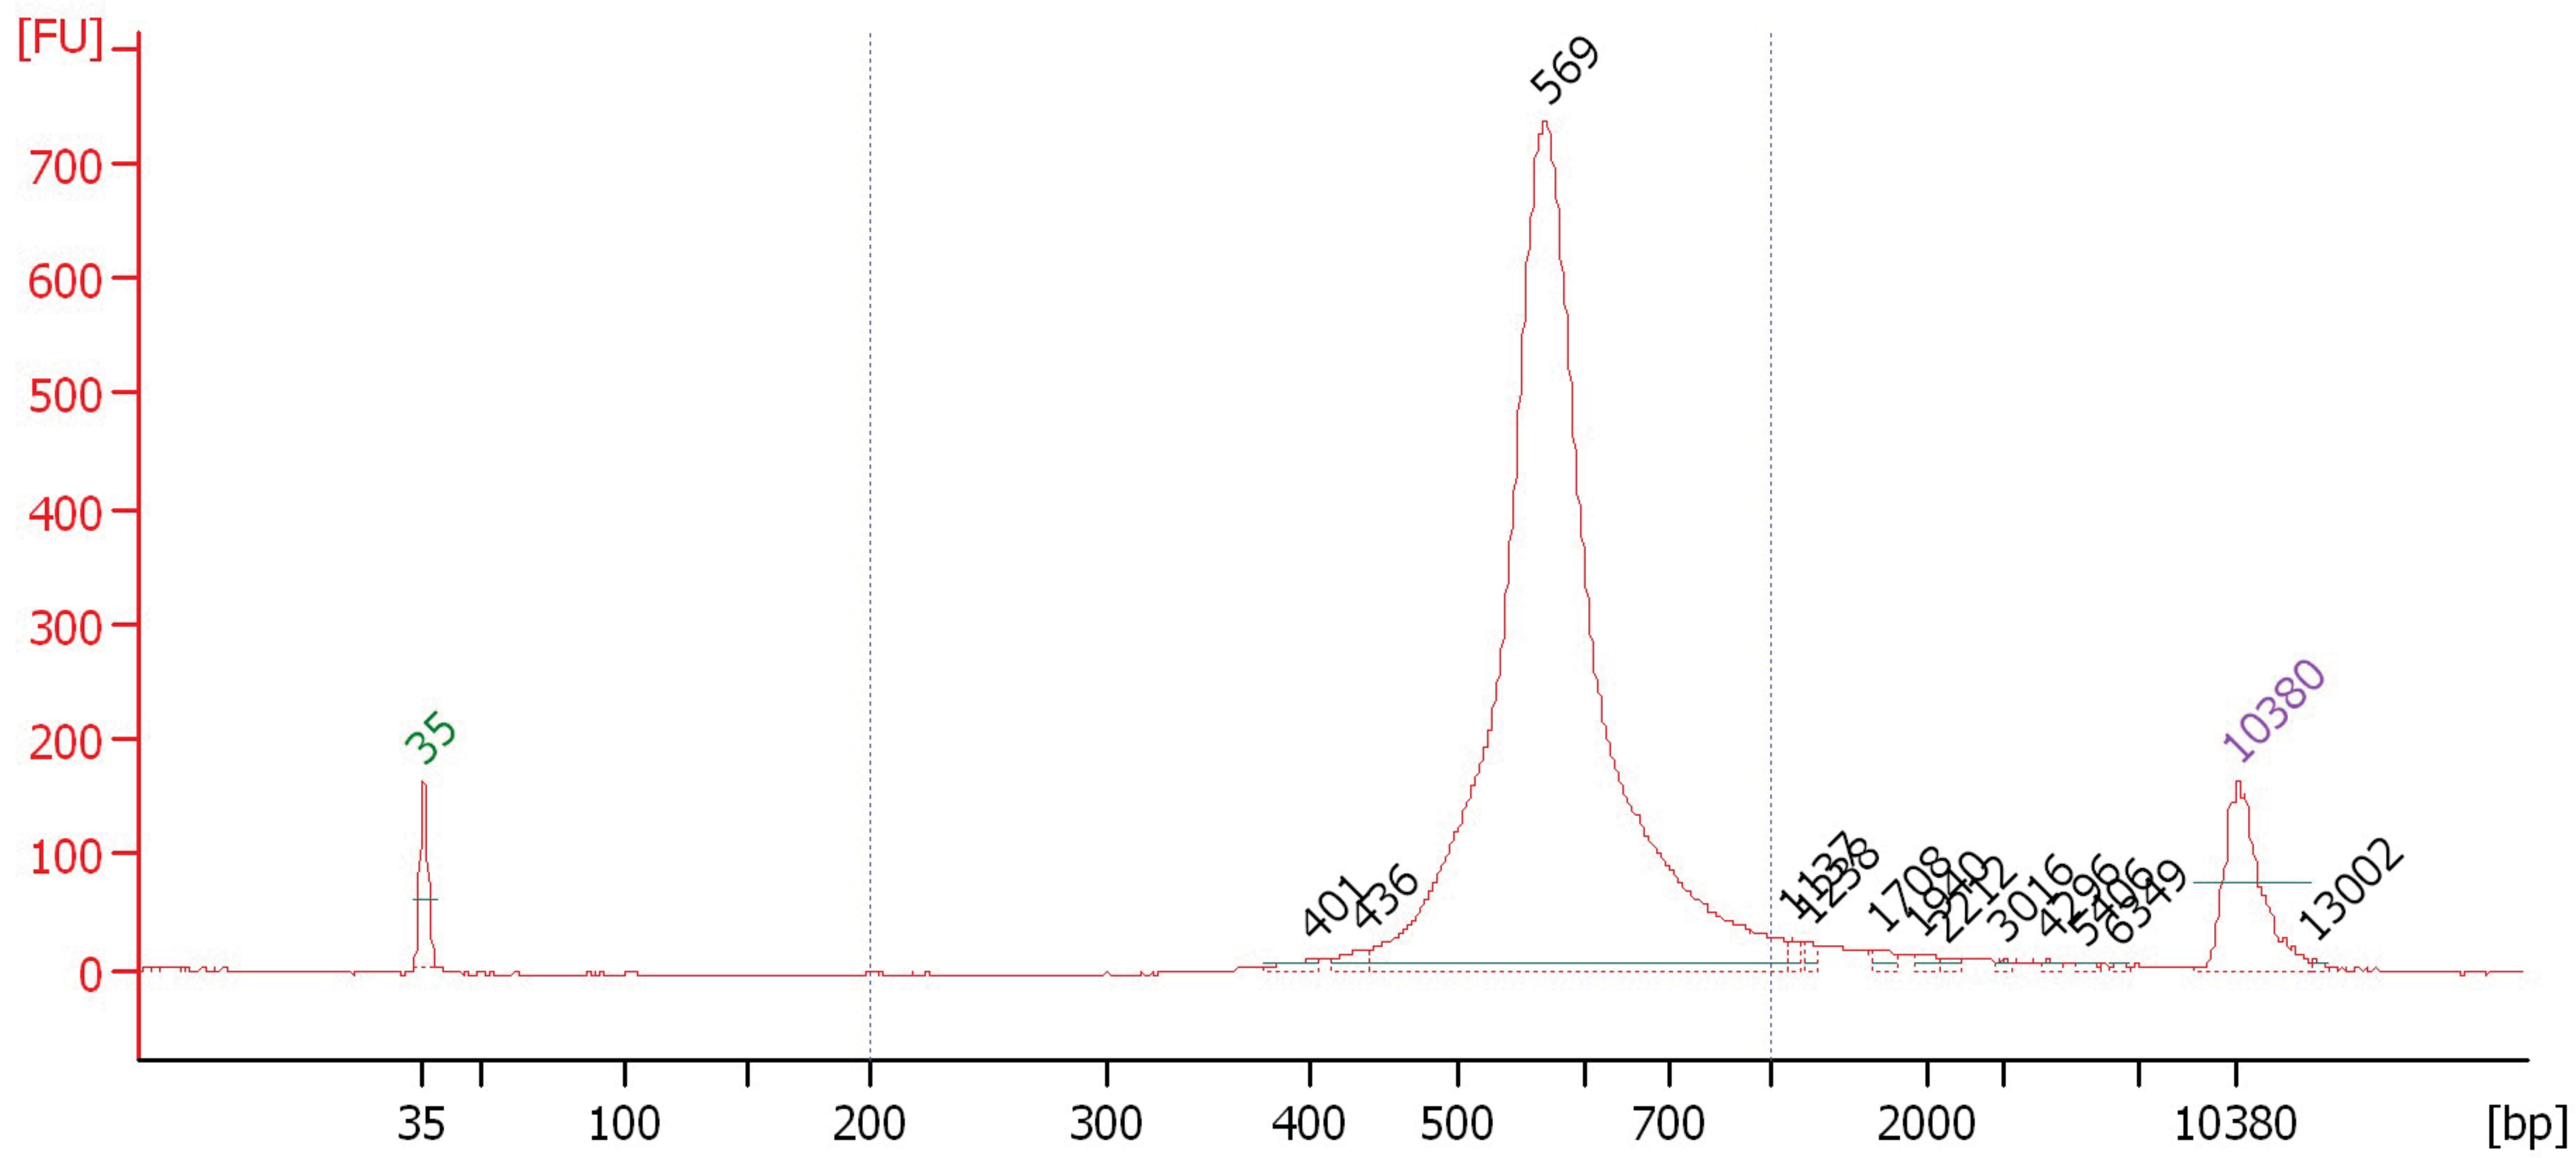

Supplement: MOESM12 [file 9736020]
